# Supplementary material for: CaIn2S4–In2O3hybrid nanofibers with expedited photocarrier separation for fast photocatalytic bacterial inactivation under visible light
Source: Royal Society of Chemistry journal article supplement (doi:10.1039/d2qi02694e), 2023-01-01
Supplement: d2qi02694e1.pdf [file d2qi02694e1.pdf]

1 **Supplementary Information**

2  
3 **CaIn<sub>2</sub>S<sub>4</sub>-In<sub>2</sub>O<sub>3</sub> hybrid nanofibers with expedited photocarrier**  
4 **separation for fast photocatalytic bacterial inactivation under**  
5 **visible light**

6 Lina Wang<sup>a, c, ‡</sup>, Zhiping Wan<sup>b, ‡</sup>, Xiaoxiang Xu<sup>a, c, \*</sup>, and Jun Qian<sup>b, \*</sup>

7  
8 *<sup>a</sup>Shanghai Key Lab of Chemical Assessment and Sustainability, School of Chemical*  
9 *Science and Engineering, Tongji University, Shanghai, 200092, China*

10 *Email: [xxxu@tongji.edu.cn](mailto:xxxu@tongji.edu.cn)*

11 *<sup>b</sup>Department of Neurosurgery, Tongji Hospital, Tongji University School of Medicine,*  
12 *Tongji University, 389 Xincun Road, Shanghai, 200065, China*

13 *Email: [qianjun19@126.com](mailto:qianjun19@126.com)*

14 *<sup>c</sup>Clinical and Central Lab, Putuo People's Hospital, Tongji University, Shanghai,*  
15 *200060, China*

16  
17  
18 \* Corresponding authors

19 ‡ These authors contributed equally.

20 **Supplementary information content**

21 **Number of pages: 12 (S1-S12)**

22 **Number of figures: 12 (Figure S1-S12)**

23 **Number of Tables: 2 (Table S1-S2)**

## 24 Contents

25 **Figure S1.** FE-SEM image of as-prepared  $\text{In}_2\text{O}_3$  fibers by the electrospinning method.

26 S4

27 **Figure S2.** SEM-EDS mapping of single  $\text{CaIn}_2\text{S}_4\text{-In}_2\text{O}_3$  fiber, the element content is  
28 tabulated in the inset table. S4

29 **Figure S3.** (a) TEM image of a single  $\text{In}_2\text{O}_3$  fiber, inset shows the selected area  
30 electron diffraction patterns; (b) high resolution TEM image of a single  $\text{In}_2\text{O}_3$  fiber,  
31 the lattice fringes marked correspond to (222), (112) and (226) planes of  $\text{In}_2\text{O}_3$ .

32 S5

33 **Figure S4.** FE-SEM image of  $\text{CaIn}_2\text{S}_4\text{-In}_2\text{O}_3$  fibers with different  $\text{CaIn}_2\text{S}_4/\text{In}_2\text{O}_3$   
34 molar ratio: (a) 1:2; (b) 1:1; (c) 2:1. S5

35 **Figure S5.** TEM image of  $\text{CaIn}_2\text{S}_4$  nanofoils of the  $\text{CaIn}_2\text{S}_4\text{-In}_2\text{O}_3$  fibers.

36 S6

37 **Figure S6.** FE-SEM images of (a)  $\text{CaIn}_2\text{S}_4\text{-In}_2\text{O}_3$  fibers; (b)  $\text{CaIn}_2\text{S}_4\text{-In}_2\text{O}_3$  mixtures,  
38 the  $\text{CaIn}_2\text{S}_4/\text{In}_2\text{O}_3$  molar ratio is fixed at 1:1. S6

39 **Figure S7.** FE-SEM images of  $\text{CaIn}_2\text{S}_4\text{-In}_2\text{O}_3$  fibers before and after mechanical  
40 grinding: (a)  $\text{CaIn}_2\text{S}_4\text{-In}_2\text{O}_3$  fibers before grinding; (b)  $\text{CaIn}_2\text{S}_4\text{-In}_2\text{O}_3$  debris after  
41 grinding. S7

42 **Figure S8.** (A) FE-SEM images of  $\text{In}_2\text{O}_3$  and  $\text{CaIn}_2\text{S}_4\text{-In}_2\text{O}_3$  fibers with different  
43 aspect ratios: (a)  $\text{In}_2\text{O}_3$  fibers with diameter of 85 nm; (b)  $\text{CaIn}_2\text{S}_4\text{-In}_2\text{O}_3$  fibers  
44 prepared using  $\text{In}_2\text{O}_3$  fibers with diameter of 85 nm; (c)  $\text{In}_2\text{O}_3$  fibers with diameter of  
45 190 nm; (d)  $\text{CaIn}_2\text{S}_4\text{-In}_2\text{O}_3$  fibers prepared using  $\text{In}_2\text{O}_3$  fibers with diameter of 190 nm.

46 (B) Photocatalytic disinfection activity of  $\text{CaIn}_2\text{S}_4\text{-In}_2\text{O}_3$  fibers with different aspect  
47 ratios from (A). S7

48 **Figure S9.** XRD patterns of  $\text{CaIn}_2\text{S}_4\text{-In}_2\text{O}_3$  fibers before and after photocatalytic  
49 disinfection experiments. S8

50 **Figure S10.** (a) DMPO spin-trapping EPR spectra for  $\cdot\text{OH}$ ; (b) TEMP spin-trapping  
51 EPR spectra for  $^1\text{O}_2$ . S8

52 **Figure S11.** Bacterial colony growth results for illuminated  $\text{CaIn}_2\text{S}_4\text{-In}_2\text{O}_3$  fibers in  
53 the presence of different scavengers, *i.e.* TEMPOL for  $\cdot\text{O}_2^-$ , sodium oxalate for  $\text{h}^+$ , 2-  
54 propanol for  $\cdot\text{OH}$ , and L-tryptophan for  $^1\text{O}_2$ . S9

55 **Figure S12.** (a) Linear sweep voltammetry (LSV) of  $\text{CaIn}_2\text{S}_4\text{-In}_2\text{O}_3$  fibers,  $\text{CaIn}_2\text{S}_4$ ,  
56 and  $\text{In}_2\text{O}_3$  fibers under chopped visible light illumination ( $\lambda \geq 420$  nm); (b) transient  
57 photocurrent of  $\text{CaIn}_2\text{S}_4\text{-In}_2\text{O}_3$  fibers,  $\text{CaIn}_2\text{S}_4$ , and  $\text{In}_2\text{O}_3$  fibers; (c) Electrochemical  
58 impedance spectra of  $\text{CaIn}_2\text{S}_4\text{-In}_2\text{O}_3$  fibers,  $\text{CaIn}_2\text{S}_4$ , and  $\text{In}_2\text{O}_3$  fibers. S9

59 **Table S1.** Comparison of disinfection activity for previously reported materials.  
60 S10

61 **Table S2.** Summary of fitted decay lifetime  $\tau$  and their relative amplitude from the  
62 time-resolved photoluminescence decay spectra S11

63 **References** S11-S12

64

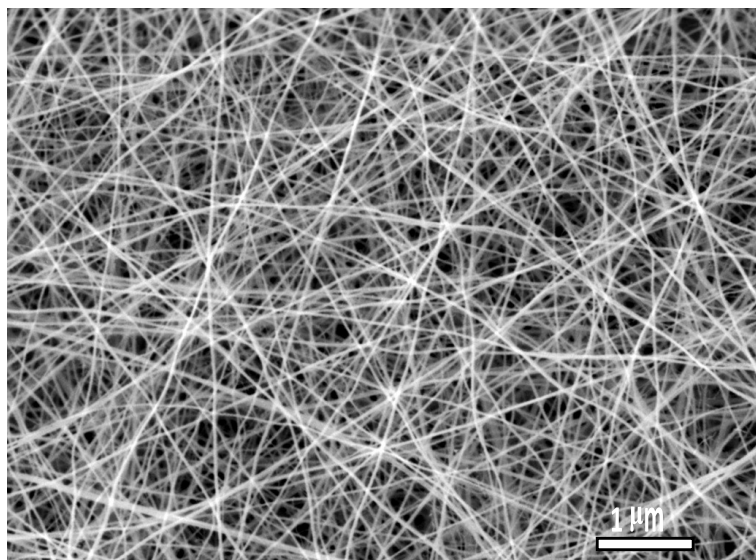

65

66 **Figure S1.** FE-SEM image of as-prepared  $\text{In}_2\text{O}_3$  fibers by the electrospinning method.

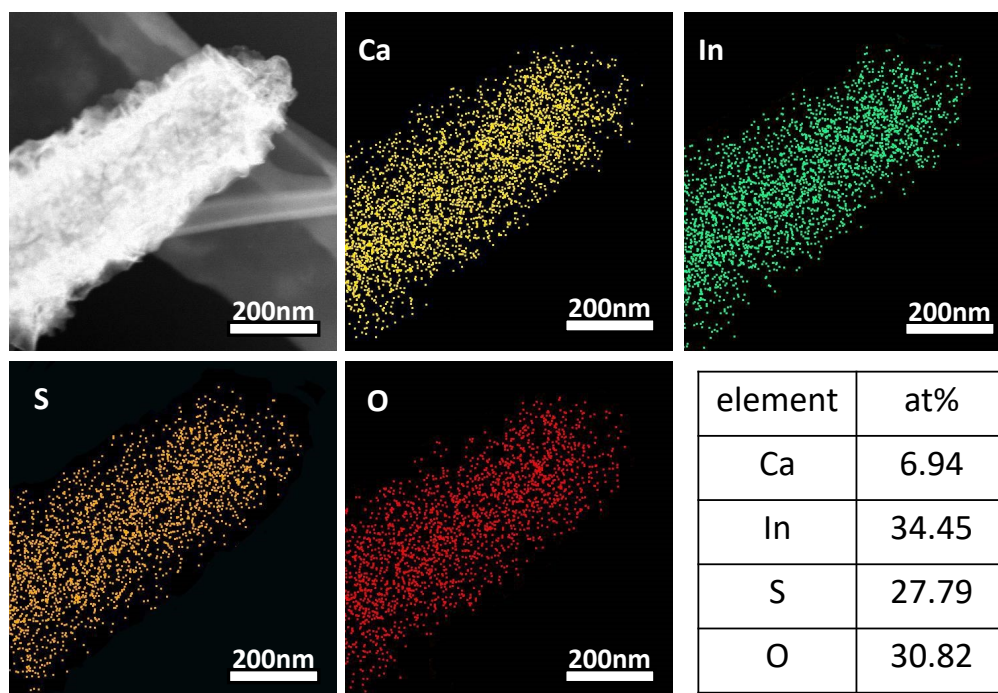

67

68 **Figure S2.** SEM-EDS mapping of single  $\text{CaIn}_2\text{S}_4\text{-In}_2\text{O}_3$  fiber, the element content is

69 tabulated in the inset table.

70

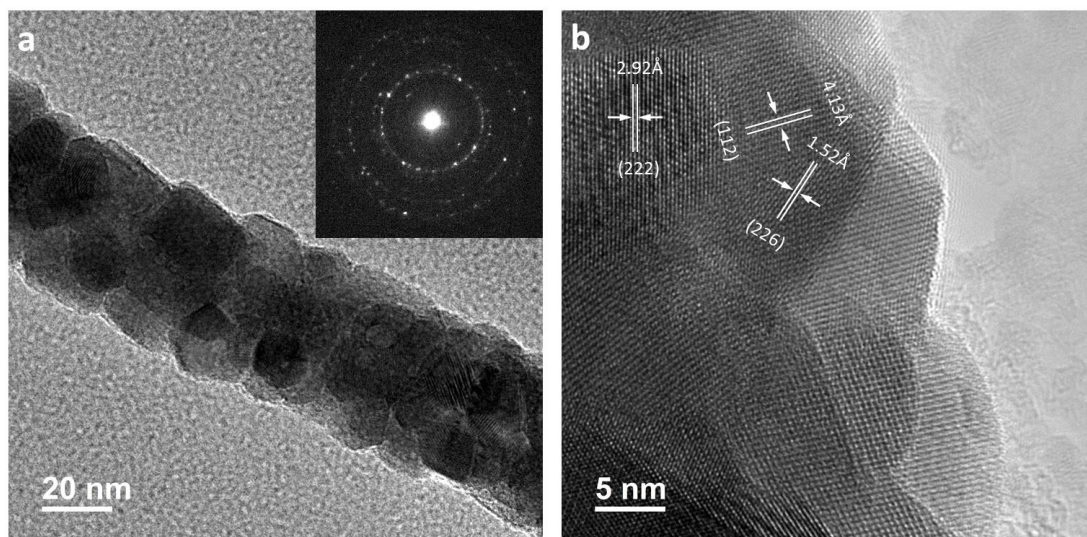

71

72 **Figure S3.** (a) TEM image of a single  $\text{In}_2\text{O}_3$  fiber, inset shows the selected area  
 73 electron diffraction patterns; (b) high resolution TEM image of a single  $\text{In}_2\text{O}_3$  fiber,  
 74 the lattice fringes marked correspond to (222), (112) and (226) planes of  $\text{In}_2\text{O}_3$ .

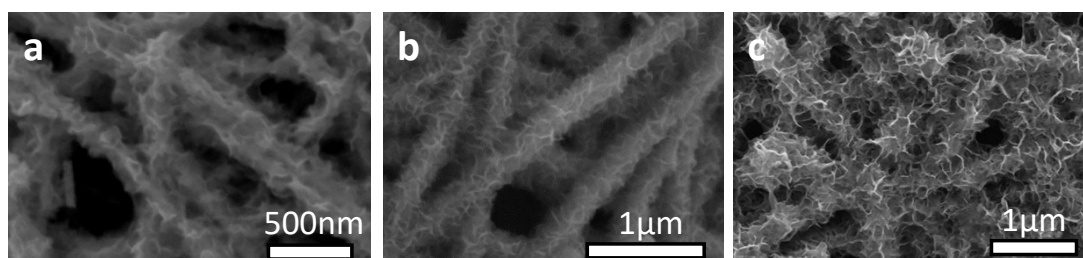

75

76 **Figure S4.** FE-SEM image of  $\text{CaIn}_2\text{S}_4\text{-In}_2\text{O}_3$  fibers with different  $\text{CaIn}_2\text{S}_4/\text{In}_2\text{O}_3$   
 77 molar ratio: (a) 1:2; (b) 1:1; (c) 2:1.

78

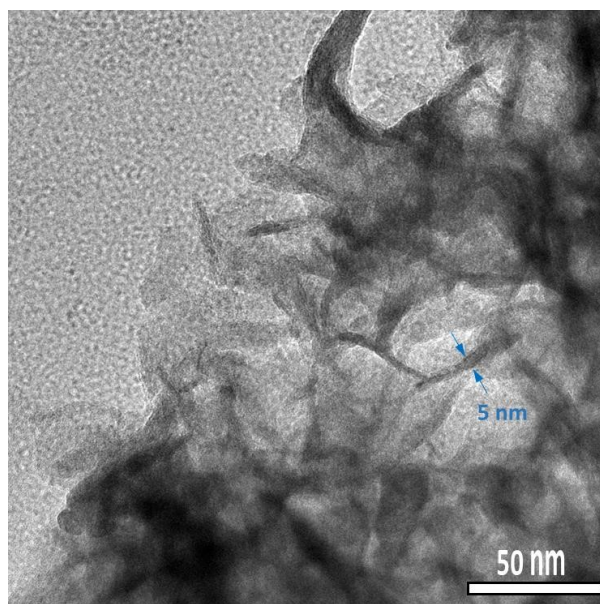

79

80 **Figure S5.** TEM image of  $\text{CaIn}_2\text{S}_4$  nanofoils of the  $\text{CaIn}_2\text{S}_4\text{-In}_2\text{O}_3$  fibers.

81

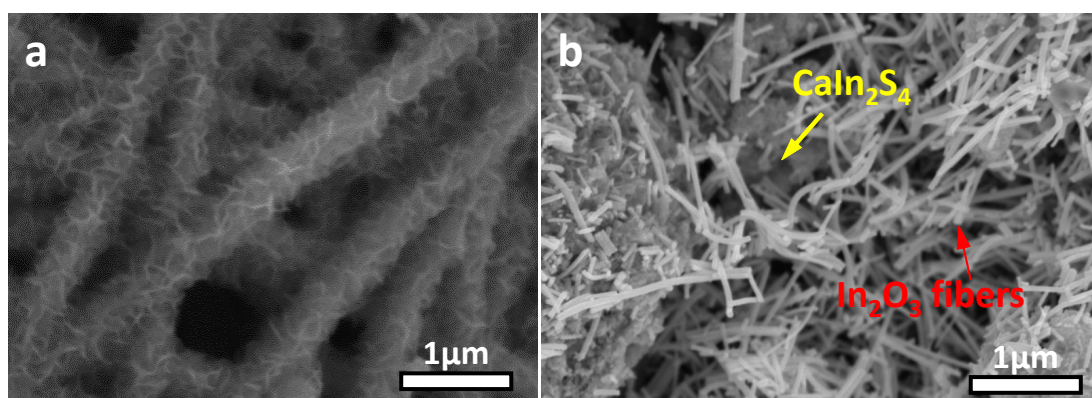

82

83 **Figure S6.** FE-SEM images of (a)  $\text{CaIn}_2\text{S}_4\text{-In}_2\text{O}_3$  fibers; (b)  $\text{CaIn}_2\text{S}_4\text{-In}_2\text{O}_3$  mixtures,

84 the  $\text{CaIn}_2\text{S}_4/\text{In}_2\text{O}_3$  molar ratio is fixed at 1:1.

85

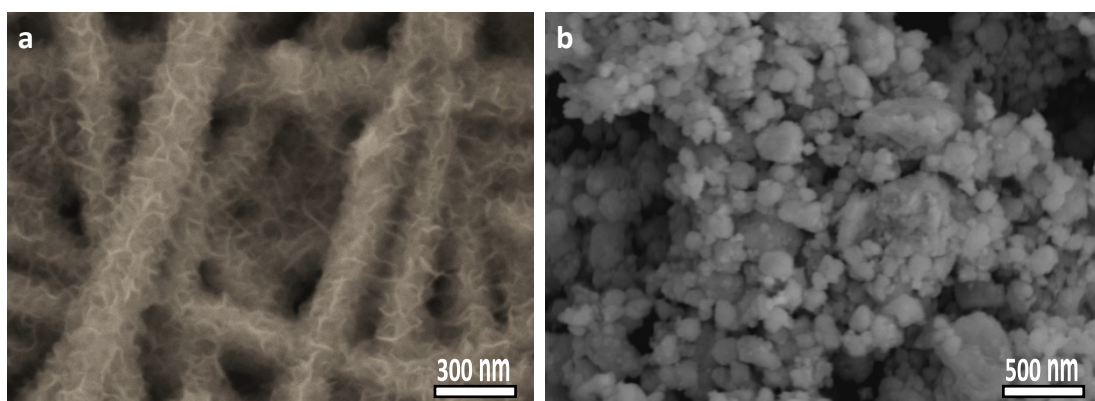

86

87 **Figure S7.** FE-SEM images of  $\text{CaIn}_2\text{S}_4\text{-In}_2\text{O}_3$  fibers before and after mechanical  
 88 grinding: (a)  $\text{CaIn}_2\text{S}_4\text{-In}_2\text{O}_3$  fibers before grinding; (b)  $\text{CaIn}_2\text{S}_4\text{-In}_2\text{O}_3$  debris after  
 89 grinding.

90

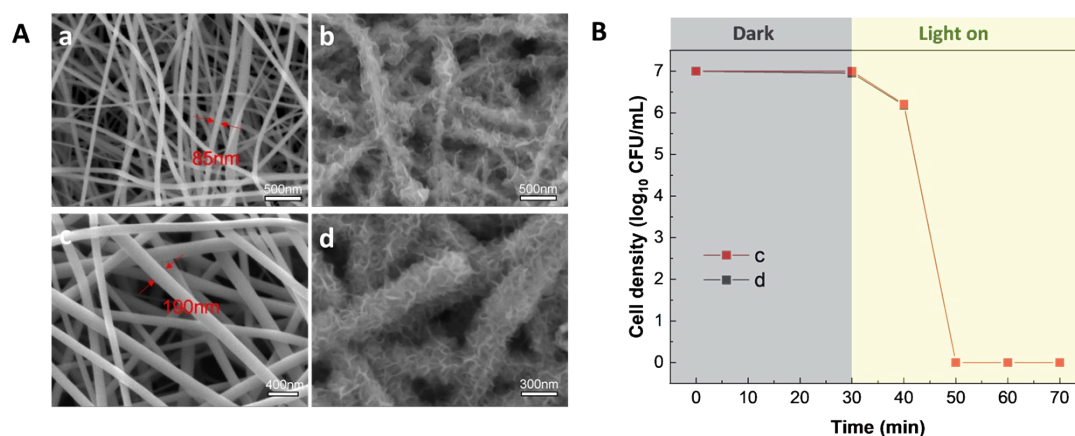

91

92 **Figure S8.** (A) FE-SEM images of  $\text{In}_2\text{O}_3$  and  $\text{CaIn}_2\text{S}_4\text{-In}_2\text{O}_3$  fibers with different  
 93 aspect ratios: (a)  $\text{In}_2\text{O}_3$  fibers with diameter of 85 nm; (b)  $\text{CaIn}_2\text{S}_4\text{-In}_2\text{O}_3$  fibers  
 94 prepared using  $\text{In}_2\text{O}_3$  fibers with diameter of 85 nm; (c)  $\text{In}_2\text{O}_3$  fibers with diameter of  
 95 190 nm; (d)  $\text{CaIn}_2\text{S}_4\text{-In}_2\text{O}_3$  fibers prepared using  $\text{In}_2\text{O}_3$  fibers with diameter of 190 nm.  
 96 (B) Photocatalytic disinfection activity of  $\text{CaIn}_2\text{S}_4\text{-In}_2\text{O}_3$  fibers with different aspect  
 97 ratios from (A).

98

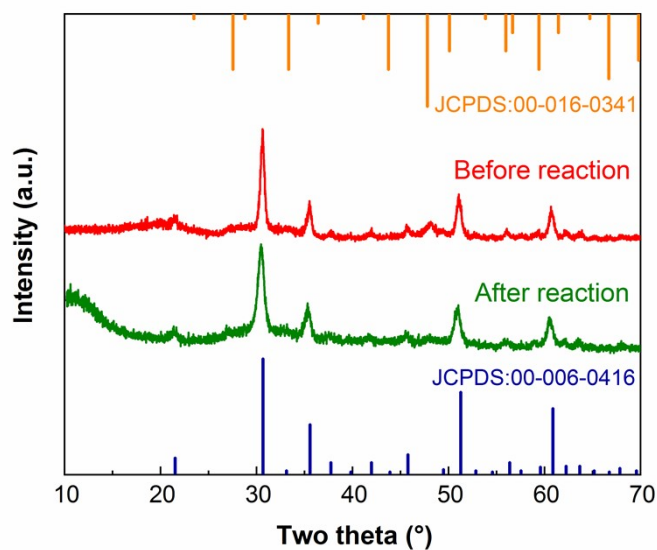

99

100 **Figure S9.** XRD patterns of  $\text{CaIn}_2\text{S}_4\text{-In}_2\text{O}_3$  fibers before and after photocatalytic  
 101 disinfection experiments.

102

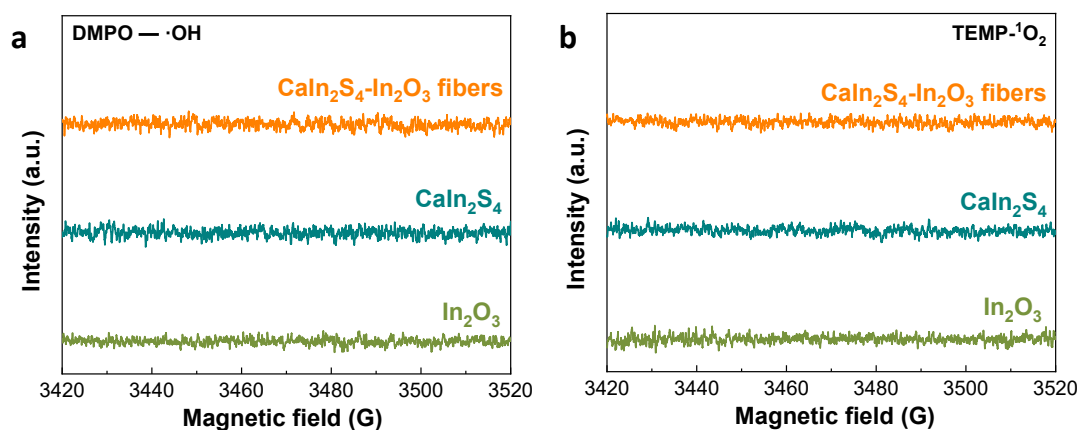

103

104 **Figure S10.** (a) DMPO spin-trapping EPR spectra for  $\cdot\text{OH}$ ; (b) TEMP spin-trapping  
 105 EPR spectra for  $^1\text{O}_2$ .

106



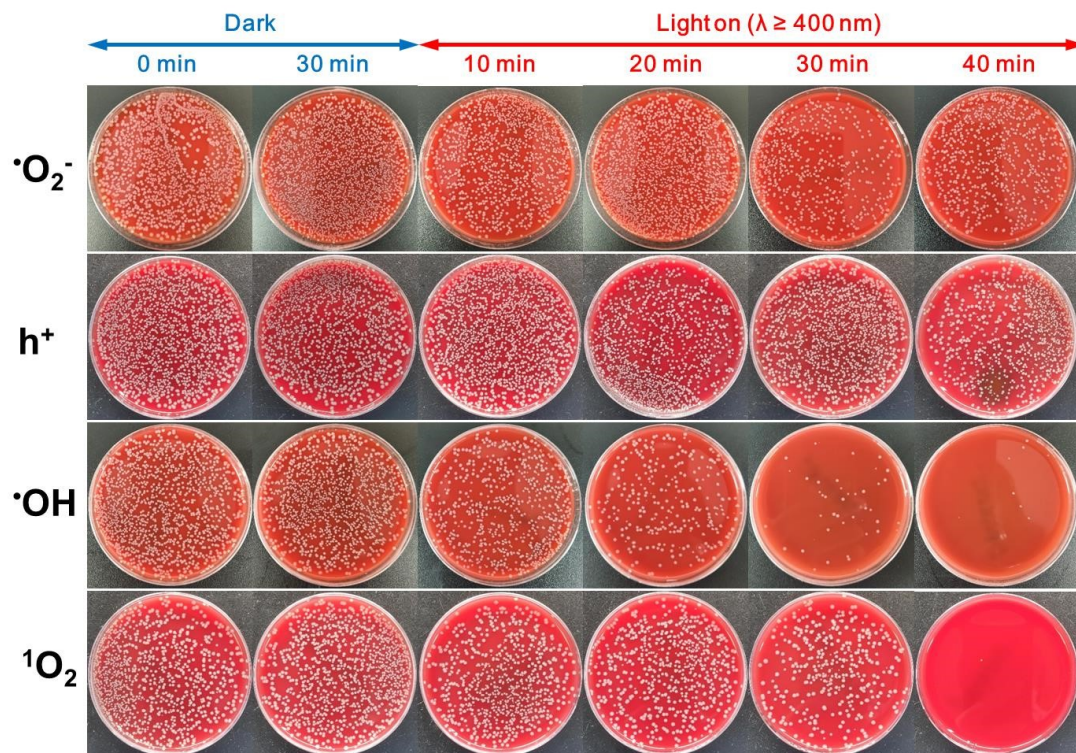

107

108 **Figure S11.** Bacterial colony growth results for illuminated  $\text{CaIn}_2\text{S}_4\text{-In}_2\text{O}_3$  fibers in  
 109 the presence of different scavengers, *i.e.* TEMPOL for  $\cdot\text{O}_2^-$ , sodium oxalate for  $\text{h}^+$ , 2-  
 110 propanol for  $\cdot\text{OH}$ , and L-tryptophan for  $^1\text{O}_2$ .

111

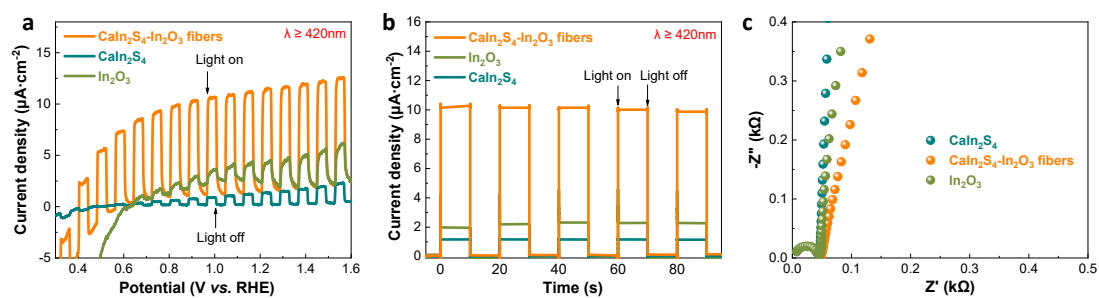

112

113 **Figure S12.** (a) Linear sweep voltammetry (LSV) of  $\text{CaIn}_2\text{S}_4\text{-In}_2\text{O}_3$  fibers,  $\text{CaIn}_2\text{S}_4$ ,  
 114 and  $\text{In}_2\text{O}_3$  fibers under chopped visible light illumination ( $\lambda \geq 420 \text{ nm}$ ); (b) transient  
 115 photocurrent of  $\text{CaIn}_2\text{S}_4\text{-In}_2\text{O}_3$  fibers,  $\text{CaIn}_2\text{S}_4$ , and  $\text{In}_2\text{O}_3$  fibers; (c) Electrochemical  
 116 impedance spectra of  $\text{CaIn}_2\text{S}_4\text{-In}_2\text{O}_3$  fibers,  $\text{CaIn}_2\text{S}_4$ , and  $\text{In}_2\text{O}_3$  fibers.

117

118 **Table S1.** Comparison of disinfection activity for previously reported materials.

| Materials                                                                  | Time<br>(min) | <i>E. coli</i> Cell<br>Density<br>(CFU / mL) | Catalyst<br>Dosage<br>(mg / mL) | Light source ( $\lambda$<br>/ nm)                                    | Inactivation | Ref.         |
|----------------------------------------------------------------------------|---------------|----------------------------------------------|---------------------------------|----------------------------------------------------------------------|--------------|--------------|
| Graphene Oxide/g-<br>C <sub>3</sub> N <sub>4</sub>                         | 120           | $1.0 \times 10^7$                            | 0.10                            | 300 W Xe lamp<br>( $\lambda \geq 420$ )                              | 7.0 log      | 1            |
| CuBi <sub>2</sub> O <sub>4</sub> /Bi <sub>2</sub> MoO <sub>6</sub>         | 240           | $1.0 \times 10^7$                            | 0.80                            | 300 W Xe lamp<br>( $\lambda \geq 420$ )                              | 7.0 log      | 2            |
| Ag<br>QDs/Bi <sub>2</sub> S <sub>3</sub> /SnIn <sub>4</sub> S <sub>8</sub> | 240           | $2.5 \times 10^7$                            | 0.60                            | 300 W Xe lamp<br>( $\lambda \geq 420$ )                              | 7.3 log      | 3            |
| MgTi <sub>2</sub> O <sub>5</sub> /g-C <sub>3</sub> N <sub>4</sub>          | 180           | $1.0 \times 10^7$                            | 0.50                            | 300 W Xe lamp<br>( $\lambda \geq 400$ )                              | 7.0 log      | 4            |
| MoS <sub>2</sub><br>QDs/Bi <sub>2</sub> WO <sub>6</sub>                    | 90            | $1.0 \times 10^6$                            | 1.00                            | 300W halogen<br>tungsten<br>projector lamp<br>( $\lambda \geq 410$ ) | 6.0 log      | 5            |
| g-C <sub>3</sub> N <sub>4</sub> /m-Bi <sub>2</sub> O <sub>4</sub>          | 90            | $1.0 \times 10^6$                            | 0.40                            | 300 W Xe lamp<br>( $\lambda \geq 400$ )                              | 6.0 log      | 6            |
| Ag <sub>2</sub> S/g-C <sub>3</sub> N <sub>4</sub>                          | 90            | $1.0 \times 10^7$                            | 0.80                            | 300 W Xe lamp<br>( $\lambda \geq 420$ )                              | 7.0 log      | 7            |
| Graphene/CdS                                                               | 60            | $1.0 \times 10^7$                            | 0.20                            | 350 W Xe lamp<br>( $\lambda \geq 420$ )                              | 5.3 log      | 8            |
| AgInS <sub>2</sub> /TiO <sub>2</sub>                                       | 180           | $1.0 \times 10^{7.2}$                        | 0.10                            | 300 W Xe lamp<br>( $325 \leq \lambda \leq 845$ )                     | 7.2 log      | 9            |
| InVO <sub>4</sub> /AgVO <sub>3</sub>                                       | 30            | $1.0 \times 10^6$                            | 0.50                            | 800 W Xe lamp<br>( $\lambda \geq 420$ )                              | 6.0 log      | 10           |
| CaIn <sub>2</sub> S <sub>4</sub> -In <sub>2</sub> O <sub>3</sub><br>fibers | 20            | $1.0 \times 10^7$                            | 0.50                            | 300 W Xe lamp<br>( $\lambda \geq 400$ )                              | 7.0 log      | This<br>work |

119

120

121 **Table S2.** Summary of fitted decay lifetime  $\tau$  and their relative amplitude from the  
 122 time-resolved photoluminescence decay spectra

| Sample                                                           | Electron lifetime |               |               | Relative amplitude |                    |                    | Average lifetime | $\chi^2$ |
|------------------------------------------------------------------|-------------------|---------------|---------------|--------------------|--------------------|--------------------|------------------|----------|
|                                                                  | $\tau_1$ (ns)     | $\tau_2$ (ns) | $\tau_3$ (ns) | A <sub>1</sub> (%) | A <sub>2</sub> (%) | A <sub>3</sub> (%) | $\tau_a$ (ns)    |          |
| In <sub>2</sub> O <sub>3</sub>                                   | 16.63             | 163.25        | 1394.00       | 5.46               | 23.23              | 71.31              | 1347.60          | 1.06     |
| CaIn <sub>2</sub> S <sub>4</sub> @In <sub>2</sub> O <sub>3</sub> | 71.90             | 331.70        | 1980.00       | 4.99               | 22.93              | 72.08              | 1892.26          | 0.98     |

123

124 The average lifetime is calculated by Equation (1):

$$\tau_a = \frac{A_1\tau_1^2 + A_2\tau_2^2 + A_3\tau_3^2}{A_1\tau_1 + A_2\tau_2 + A_3\tau_3}$$

125 (1)

126

127

## 128 References

- 129 1. L. Sung, T. Du, C. Hu, J. N. Chen, J. Lu, Z. C. Lu and H. Y. Han, Antibacterial Activity of  
 130 Graphene Oxide/g-C<sub>3</sub>N<sub>4</sub> Composite through Photocatalytic Disinfection under Visible Light,  
 131 *Acs Sustain Chem Eng*, 2017, **5**, 8693-8701.
- 132 2. H. X. Shi, J. Fan, Y. Y. Zhao, X. Y. Hu, X. Zhang and Z. S. Tang, Visible light driven  
 133 CuBi<sub>2</sub>O<sub>4</sub>/Bi<sub>2</sub>MoO<sub>6</sub> p-n heterojunction with enhanced photocatalytic inactivation of E. coli  
 134 and mechanism insight, *J Hazard Mater*, 2020, **381**, 121006.
- 135 3. H. Shi, C. Wang, Y. Zhao, E. Liu, J. Fan and Z. Ji, Highly efficient visible light driven  
 136 photocatalytic inactivation of E. coli with Ag QDs decorated Z-scheme Bi<sub>2</sub>S<sub>3</sub>/SnIn<sub>4</sub>S<sub>8</sub>  
 137 composite, *Appl Catal B-Environ*, 2019, **254**, 403-413.
- 138 4. Z. F. Jiang, B. Wang, Y. Li, H. S. Chan, H. L. Sun, T. Q. Wang, H. M. Li, S. Q. Yuan, M. K. H. Leung,  
 139 A. H. Lu and P. K. Wong, Solar-light-driven rapid water disinfection by ultrathin magnesium  
 140 titanate/carbon nitride hybrid photocatalyst: Band structure analysis and role of reactive  
 141 oxygen species, *Appl Catal B-Environ*, 2019, **257**, 117898.
- 142 5. X. C. Meng, Z. Z. Li, H. M. Zeng, J. Chen and Z. S. Zhang, MoS<sub>2</sub> quantum dots-interspersed  
 143 Bi<sub>2</sub>WO<sub>6</sub> heterostructures for visible light-induced detoxification and disinfection, *Appl Catal*  
 144 *B-Environ*, 2017, **210**, 160-172.
- 145 6. S. F. Chang, Y. W. Hu, J. Qian, Y. L. Shao, S. Ni, L. L. Kong, W. Y. Dan, C. Luo, S. Jin and X. X. Xu,  
 146 Mg<sub>2</sub>TiO<sub>4</sub> spinel modified by nitrogen doping as a Visible-Light-Active photocatalyst for  
 147 antibacterial activity, *Chem Eng J*, 2021, **410**, 128410.
- 148 7. W. Y. Zuo, L. Liang, F. G. Ye and S. L. Zhao, Construction of visible light driven silver  
 149 sulfide/graphitic carbon nitride p-n heterojunction for improving photocatalytic disinfection,  
 150 *Chemosphere*, 2021, **283**, 131167.
- 151 8. W. J. Wang, T. W. Ng, W. K. Ho, J. H. Huang, S. J. Liang, T. C. An, G. Y. Li, J. C. Yu and P. K.  
 152 Wong, CdIn<sub>2</sub>S<sub>4</sub> microsphere as an efficient visible-light-driven photocatalyst for bacterial  
 153 inactivation: Synthesis, characterizations and photocatalytic inactivation mechanisms, *Appl*  
 154 *Catal B-Environ*, 2013, **129**, 482-490.
- 155 9. J. G. Du, S. L. Ma, H. P. Liu, H. C. Fu, L. Li, Z. Q. Li, Y. Li and J. G. Zhou, Uncovering the

156 mechanism of novel AgInS<sub>2</sub> nanosheets/TiO<sub>2</sub> nanobelts composites for photocatalytic  
157 remediation of combined pollution, *Appl. Catal. B-Environ.*, 2019, **259**, 118062.  
158 10. H. L. Yan, L. Z. Liu, R. Wang, W. X. Zhu, X. Y. Ren, L. P. Luo, X. Zhang, S. J. Luo, X. L. Ai and J. L.  
159 Wang, Binary composite MoS<sub>2</sub>/TiO<sub>2</sub> nanotube arrays as a recyclable and efficient  
160 photocatalyst for solar water disinfection, *Chem Eng J*, 2020, **401**, 126052.  
161  
162  
163
